1

2

3 **Marionette: *E. coli* containing 12 highly-optimized small molecule sensors**

4

5

6 Adam J. Meyer<sup>1</sup>, Thomas H. Segall-Shapiro<sup>1</sup>, and Christopher A. Voigt<sup>1,\*</sup>

7

8 <sup>1</sup> Synthetic Biology Center, Department of Biological Engineering, Massachusetts Institute of Technology,

9 Cambridge, MA 02139, USA

10

11

12

13

14

15

16

17

18

19

20 \*Correspondence and request for materials should be addressed to C.A.V. ([cavoigt@gmail.com](mailto:cavoigt@gmail.com))

21

22

23 Key words: *Synthetic biology, directed evolution, biosensor, gene expression*

24

25

26

27

28

29 **Cellular processes are carried out by many interacting genes and their study and optimization requires**  
30 **multiple levers by which they can be independently controlled. The most common method is via a**  
31 **genetically-encoded sensor that responds to a small molecule (an “inducible system”). However, these**  
32 **sensors are often suboptimal, exhibiting high background expression and low dynamic range. Further,**  
33 **using multiple sensors in one cell is limited by cross-talk and the taxing of cellular resources. Here, we**  
34 **have developed a directed evolution strategy to simultaneously select for less background, high**  
35 **dynamic range, increased sensitivity, and low crosstalk. Libraries of the regulatory protein and output**  
36 **promoter are built based on random and rationally-guided mutations. This is applied to generate a set**  
37 **of 12 high-performance sensors, which exhibit >100-fold induction with low background and cross-**  
38 **reactivity. These are combined to build a single “sensor array” and inserted into the genomes of *E. coli***  
39 **MG1655 (wild-type), DH10B (cloning), and BL21 (protein expression). These “Marionette” strains allow**  
40 **for the independent control of gene expression using 2,4-diacetylphosphoglucinol (DAPG), cuminic**  
41 **acid (Cuma), 3-oxohexanoyl-homoserine lactone (OC6), vanillic acid (Van), isopropyl  $\beta$ -D-1-**  
42 **thiogalactopyranoside (IPTG), anhydrotetracycline (aTc), L-arabinose (Ara), choline chloride (Cho),**  
43 **naringenin (Nar), 3,4-dihydroxybenzoic acid (DHBA), sodium salicylate (Sal), and 3-**  
44 **hydroxytetradecanoyl-homoserine lactone (OHC14).**

45 Advances in biology are often tied to new methods that use external stimuli to control the levels  
46 of gene expression<sup>1-3</sup>. Pioneered in the early 1980s, so-called inducible systems were developed that allow  
47 genes to be turned on by adding a small molecule inducer to the growth media<sup>4</sup>. These consist of a protein  
48 transcription factor (*e.g.*, LacI) whose binding to a DNA operator in a promoter is controlled by the inducer  
49 (*e.g.*, IPTG). Initially co-opted from natural regulatory networks, over the years many versions were  
50 designed to improve performance. In the 1990s, additional systems were developed that responded to  
51 other inducers, notably arabinose and aTc, which became common tools in the field. In 1997, Lutz and  
52 Bujard published a seminal paper that combined three (IPTG, arabinose, aTc) that could be easily  
53 interchanged on a two-plasmid system<sup>5</sup>. Its organizational simplicity, compatibility, and quantified  
54 response functions were revolutionary. Beyond providing a new tool to biologists to control multiple  
55 genes with independent “strings,” it facilitated researchers with quantitative backgrounds to enter  
56 biology<sup>6-7</sup>. Armed with the new ability to control two genes with precision, physicists and engineers built  
57 the first synthetic genetic circuits, performed single molecule experiments inside cells, deconstructed the  
58 origins of noise in gene expression, determined how enzyme balancing impacts metabolic flux, elucidated  
59 rules underlying the assembly of molecular machines, and built synthetic symbiotic microbial  
60 communities, just to highlight a few<sup>8-19</sup>.

61           Sensor performance is quantified by its response function; in other words, how the concentration  
62 of inducer changes the activity of the output promoter (Figure 1a). Often, this promoter retains a residual  
63 activity in the absence of inducer (“leakiness”). This hampers the ability to explore low expression levels  
64 or keep a gene in the off state, particularly needed for toxic proteins<sup>20-21</sup>. Another important parameter is  
65 the dynamic range, defined as the ratio of promoter activity in the on and off states. When this is large,  
66 both high and low expression can be explored as well as many intermediate states. The sensitivity is the  
67 concentration of inducer that turns a sensor on (defined as 50% activation). A lower sensitivity reduces  
68 the amount of a chemical that must be added to the media. Further, when multiple sensors are combined  
69 into one cell, they can interfere with each other’s response functions (Figure 1b). Some small molecules  
70 bind non-cognate regulators and this can lead to off-target activation (cross reactivity) or competitive  
71 inhibition with the cognate small molecule (antagonism)<sup>22-27</sup>. Finally, each sensor requires cellular  
72 resources (*e.g.*, ribosomes) to function and the activation of one sensor can influence another indirectly  
73 due to resource competition<sup>28</sup>. Each sensor also requires ~1-2 kb of DNA and this becomes increasingly  
74 difficult to carry on plasmids. These challenges limit the number of sensors that can be put in a single cell  
75 and the maximum reported to date is four<sup>29</sup>.

76           Sensors can be improved using biophysical models, rational engineering and directed evolution<sup>5</sup>,  
77 <sup>23, 26, 30-36</sup>. Improving performance requires that screens or selections be performed in the presence and  
78 absence of inducer<sup>37</sup>. Such dual selections have been accomplished by sorting cells based low and high  
79 fluorescence, utilizing proteins that can be both toxic and selective (*e.g.*, TetA or HSV-TK), or by deploying  
80 separate positive and negative selections<sup>26, 35, 37-44</sup>. This has been applied to improving the response  
81 functions and eliminating cross-reactivity between pairs of regulators<sup>23, 26, 35, 45</sup>.

82           Here, we have developed a selection methodology that allows us to intervene at multiple steps in  
83 order to simultaneously select for improved response functions and decreased crosstalk (Figure 1c). First,  
84 we built 12 sensors that respond to different small molecules and made directed changes in order to  
85 improve function. These sensors were then subjected to multiple rounds of negative-positive selection.  
86 Negative selection is facilitated by a promiscuous A294G mutant of the phenylalanine aminoacyl tRNA-  
87 synthetase (PheS)<sup>46</sup>. In the absence of inducer, leaky transcription of PheS leads to the charging of  
88 phenylalanyl-tRNA with the non-canonical amino acid 4-Chloro-DL-phenylalanine (Cl-Phe). Adding more  
89 Cl-Phe increases the stringency of the selection by making PheS transcription more toxic<sup>43, 47</sup>. Positive  
90 selection is facilitated by a thermostable DNA polymerase (DNAP), either KOD DNAP from the archaea  
91 *Thermococcus kodakarensis*<sup>48</sup> (for stringent replication) or the engineered PK6 DNAP<sup>49</sup> (to introduce  
92 mutations). In the presence of inducer, the level of DNAP can be quantified by PCR amplification of the

93 sensor library after the cells are emulsified with primers<sup>50-51</sup>. Multiple properties of the response function  
94 can be simultaneously improved during one cycle of negative-positive selection and stringency altered by  
95 changing the concentrations of Cl-Phe and inducer. Further, cross reactions can be selected against by  
96 adding the inducer or regulator from a problematic system. The dual selection is applied over multiple  
97 rounds to create a highly-optimized set of sensors. From these, we identify 12 that can be used together  
98 in a single strain, and these are combined and integrated into the genomes of *E. coli* MG1655, DH10B, and  
99 BL21 in order to create the Marionette family of strains. Genome integration increases stability and  
100 reduces the cellular resources required to maintain regulator expression. It also simplifies the use of the  
101 inducible systems, where only the output promoters need to be incorporated into a design (*e.g.*, for the  
102 expression of multiple proteins from a plasmid).

103 An initial set of 17 putative sensors were designed. Each sensor consists of a weak constitutive  
104 promoter ( $P_{LacI}$ , Supplementary Table 1) driving the expression of the regulatory gene and an output  
105 promoter that is acted on by the regulator. The regulatory genes were either codon optimized and  
106 synthesized or cloned (Methods and Supplementary Table 4). The output promoters were either  
107 obtained from the literature or, in the case of  $P_{Van}$ , rationally designed by inserting cognate operator  
108 sequences into unregulated promoters (Supplementary Table 1). The activity of the output promoter was  
109 measured through the expression of yellow fluorescent protein (YFP) using flow cytometry and reported  
110 in relative promoter units (RPU) (Supplementary Figure 1 and Methods). Each complete sensor was  
111 cloned into the same sensor plasmid architecture (Supplementary Figure 2). Some sensors require  
112 additional genes, which are encoded as an operon with the regulatory protein. For the Ara-inducible  
113 system, the transporter *araE* was included in order to produce a graded response<sup>52</sup>. For the Ery-inducible  
114 system, the ribosome methylase *ery<sup>R</sup>* was included to confer resistance to Ery<sup>53</sup>.

115 Rational mutations were made to improve some sensors prior to performing the direction  
116 evolution experiments. Multiple versions of each sensor, each with different a promoter and RBS used to  
117 drive the expression of the regulator, were tested (Supplementary Figure 3). The version with the largest  
118 dynamic range was chosen for further optimization. Then, a number of potential improvements gleaned  
119 from the literature or rationally designed were evaluated, the results of which are shown in  
120 Supplementary Figure 4. After this step, we reduced the set of sensors to 14, removing copper, glucaric  
121 acid and paraquat inducible systems because their responses were too small for subsequent optimization.  
122 The response functions of the initial sensors are shown in Figure 2 (grey curves). Each function was  
123 obtained by fitting the experimental data to the equation

124 
$$y = y_{min} + (y_{max} - y_{min}) \frac{x^n}{K^n + x^n} \quad , \quad (1)$$

125 where  $y$  is the promoter activity in RPU,  $x$  is the concentration of the small molecule,  $y_{min}$  is the leakiness,  
126  $y_{max}/y_{min}$  is the dynamic range,  $K$  is the sensitivity, and  $n$  is the cooperativity. The raw data points, including  
127 error bars, used for this fit are shown in Supplementary Figure 5. While they all show some response, the  
128 high leakiness, low dynamic range and low sensitivity are apparent for many. Of the 14, the aTc- and OC6-  
129 sensors produced a good enough response to not require additional optimization (Table 1).

130 The remaining 12 were then subjected to directed evolution using the dual selection (Figure 1c,  
131 Supplementary Figure 6). For each sensor, a library was constructed and cloned upstream of the operon  
132 containing PheS and DNAP (Figure 1a) on a dual selection plasmid. The initial library contained a mixture  
133 of random and rational mutations. For a subset of sensors, the output promoter was mutagenized:  
134 selected bases in the -10 box and -35 box were randomized. To control regulator expression, critical  
135 bases in the ribosome binding site (RBS) were randomized. For LacI and AraC, we partially mutagenized  
136 key amino acid residues based on prior work<sup>23, 33-34</sup>. Specifically, the genes were PCR amplified with  
137 primers of limited degeneracy (*e.g.*, VNA, WKK, or NDC) thus allowing LacI Q18, F161, W220, Q291, and  
138 L296 and AraC L133, E165, E169, and C280 to sample a subset of possible amino acids (Methods). The  
139 specific mutations made to the initial library for each sensor are shown in Supplementary Appendix 2.

140 Multiple rounds of the dual selection were performed with the initial library. Between 4 and 23  
141 rounds were performed, depending on how many issues needed to be corrected for each sensor.  
142 Different interventions were performed during each round to bias solutions to address problems  
143 identified for each sensor. The conditions for each round are presented in detail in Supplementary  
144 Appendix 2. Typically, the stringency of the negative selection was increased at a particular round by  
145 increasing the concentration of Cl-Phe from 2 mM to 4 mM. This biases against leakiness in the absence  
146 of inducer. During positive selection, inducer was added to the surviving cells, leading to the expression  
147 of DNAP. During early rounds, the maximum amount of inducer was added. For some sensors, we sought  
148 to increase the sensitivity of the response by reducing the amount of inducer after each round; for  
149 example, BetI was induced with 1 mM Cho in the final round of selection, down from 5 mM Cho in the  
150 first round. After induction, the cells were encapsulated, lysed, and PCR amplified using the DNAP  
151 expressed by the sensor (Methods). In early rounds, additional random mutations throughout the sensor  
152 were introduced by using the PK6 DNAP during the positive selection (yielding an average of 1-2 mutations  
153 per kilobase). In later rounds, the stringent KOD DNAP was used to reduce the diversity in the population.  
154 After the amplification step of the positive selection, the constructs were recloned into the selection  
155 plasmid. Recloning allows the selection plasmid to be reset each round, thus preventing the accumulation  
156 of cheaters, and offers the opportunity to change the DNAP as needed. In some cases, in an effort to

157 combine multiple beneficial mutations into a single variant, gene shuffling<sup>54</sup> was used between rounds  
158 (Methods).

159 During the selection rounds, additional interventions were included in order to reduce crosstalk  
160 between systems. For example, crosstalk between the IPTG- and Ara- sensors is well known, where IPTG  
161 reduces the output of the AraC/P<sub>BAD</sub> system<sup>23</sup> (Supplementary Figure 7). To identify mutants that reduce  
162 this, 1000  $\mu$ M IPTG was included during all rounds of selection for the Ara sensor. IPTG was also included  
163 in the negative selection to prevent the evolution of an IPTG-induced AraC mutant. Crosstalk between  
164 Van and DHBA was also observed and eliminated through the negative selection (Figure 2b,  
165 Supplementary Figure 8). Salicylate was also found to antagonize the Cuma sensor (Figure 2c,  
166 Supplementary Figure 7) and cross react with the DAPG sensor (Figure 2b, Supplementary Figure 8) and  
167 was thus added to both the positive and negative selections.

168 After all of the rounds of selection are complete, the library was assembled into a YFP screening  
169 plasmid (Supplementary Figure 6). Several clones were picked and assayed for output expression in the  
170 presence and absence of inducer (Supplementary Appendix 2). In addition, when selecting against  
171 crosstalk, the clones were screened for induction by these molecules. The mutants showing highest  
172 improvement (leakiness, sensitivity, dynamic range, and orthogonality) were identified and sequenced  
173 (Supplementary Appendix 2). Based on the mutations observed, one or more consensus sequences were  
174 constructed and re-screened to identify the best variant. The final sequences of the evolved sensors,  
175 including the mutations identified are provided in Supplementary Table 4. Mutations were identified  
176 throughout the sensors, including the promoter/RBS controlling regulator expression, synonymous and  
177 non-synonymous mutations throughout the regulator genes, and mutations/substitutions in the output  
178 promoters (Figure 2a). On average, about eight cumulative mutations were made to each sensor as a  
179 result of the rounds of dual selection.

180 The improvements in the response functions are shown in Figure 2a (blue curves). The fit  
181 parameters to Equation 1 are provide in Table 1 (raw data are provided in Supplementary Figure 5). There  
182 is marked improvement in many of the response functions, sometimes showing orders of magnitude  
183 changes in the leakiness, dynamic range, and sensitivity. The Ery- and Acu- sensors showed slight  
184 improvements in their response functions, but were not chosen to be part of the final set because of their  
185 low dynamic range.

186 CymR, NahR, VanR, PhIF, and PcaU each responds to a substituted benzene. Therefore, we  
187 examined the activity of this set of sensors against all five inducers. The optimized sensors showed  
188 significant reduction in the crosstalk while maintaining high activity with their cognate inducer (Figure 2b,

189 Supplementary Figure 8). Improvements in the antagonism between CymR and Sal were also tested  
190 (Figure 2c, Supplementary Figure 7). In the presence of 100  $\mu$ M Sal, the ability for Cuma to induce its  
191 sensor drops by 1200-fold. The sensor obtained by rounds of positive selection in the presence of Cuma  
192 reduces this by two orders of magnitude. There is also slight antagonism of AraC by IPTG, which also  
193 improved as a result of the selection (Supplementary Figure 7). Collectively, these improvements allow  
194 for all of these sensors to be used simultaneously in a single cell.

195 The best 12 sensors were then combined to form a “sensor array” that was inserted into the  
196 genome of *E. coli* MG1655 to create “Marionette-Wild” (Figure 3 and Supplementary Table 6). Genomic  
197 insertion has several benefits: it stabilizes the cluster and simplifies the use of multiple systems without  
198 building large plasmids containing the regulators. The array consists of the 12 regulatory genes and *araE*  
199 transporter organized into several operons (Figure 3a and Supplementary Figure 9). The genes were  
200 organized into three operons controlled by three medium-strength constitutive promoters. Each gene is  
201 encoded by its own ribosome binding site (RBS), which was rationally designed using the RBS Calculator<sup>55</sup>  
202 in order to achieve equivalent expression as when encoded on the plasmid (Methods and Supplementary  
203 Figure 10). Strong terminators were included before and after the sensor array in order to insulate the  
204 array from context effects. Phage transduction was used to move the sensor array to create two  
205 additional cell lines: the *recA*-deficient *E. coli* DH10B strain for cloning “Marionette-Clo” and the protease-  
206 deficient *E. coli* BL21 for protein expression “Marionette-Pro” (Methods).

207 The responses of the 12 genomically-encoded sensors in Marionette-Wild are shown in Figure 3b,  
208 the parameters derived from the fits to Equation 1 are shown in Table 1, and the raw data points are  
209 provided in Supplementary Figure 11 and Supplementary Appendix 1. Each response was measured by  
210 transforming the strain with a p15a (Supplementary Figure 2) plasmid containing the output promoter  
211 fused to YFP. Each response function shows at least 100-fold induction with similar levels of on- and off-  
212 states. The technical information for the use of each sensor is organized as a series of datasheets in the  
213 Supplementary Information. The response of each sensor was also measured in Marionette-Clo and  
214 Marionette-Pro (Supplementary Appendix 1). The performances of the sensors closely match that of  
215 Marionette-Wild with several exceptions; notably, the responses to IPTG ( $P_{\text{Tac}}$ ) and choline ( $P_{\text{BetI}}$ ) are  
216 leakier.

217 All of the sensors follow similar induction dynamics, with induction after 15 minutes and full  
218 induction by 2 hours. Interestingly, those sensors based on activators were slower to turn on, as  
219 compared to those based on repressors (Supplementary Figure 12). There is little cross reactivity from  
220 the non-cognate inducers (Figure 3c and Supplementary Figure 13). The response functions for three

221 different promoters were also measured in the presence of the maximum levels of all 11 other inducers,  
222 and there was little change in dynamic range (Supplementary Figure 14). The sensor responses were  
223 measured during exponential growth. To evaluate performance in stationary phase, cells were grown  
224 overnight (~20 hours) and response functions were measured (Methods). The responses closely match  
225 those measured during exponential growth, with several exceptions (Supplementary Figure 12). Induction  
226 on plates where the inducers are added to LB-agar resulted in similar responses as those observed in early  
227 stationary phase (Supplementary Figure 15).

228 We tested whether carrying the sensor array impacts the growth rate of the three Marionette  
229 strains (Supplementary Figure 16). The Marionette-Wild strain grows with a doubling time of  $27.8 \pm 1.3$   
230 min as compared  $25.3 \pm 1.3$  for wild-type *E. coli* MG1655 (Methods). The other two Marionette strains  
231 grow slightly faster, albeit within error (Supplementary Figure 16). Growth of Marionette-Wild was also  
232 evaluated in the presence of all 12 inducers at maximum levels and only a modest effect was observed  
233 (Supplementary Figure 16).

234 Carrying the sensor array requires the continuous expression of 12 regulatory proteins and a  
235 transporter. This could lead to a draw on cellular resources that confers a selective advantage to  
236 eliminating the array. While genomic insertion improves evolutionary stability<sup>21, 56-57</sup>, it could still be  
237 disrupted over time, particularly for the *recA*-positive<sup>58</sup> Marionette-Wild. To address this, we performed  
238 three independent experiments to assess the evolutionary stability of Marionette-Wild. First, we  
239 determined whether Marionette could reliably control a plasmid based promoter, even after extended  
240 passage. The 12 reporter strains were passaged for 14 days in liquid culture without inducer, diluting the  
241 cells  $10^6$ -fold each day ( $10^{84}$ -fold dilution total). On each day, a subset of cells from each line were grown  
242 and assayed with and without inducer (Figure 3d and Supplementary Figure 17). Second, the Marionette-  
243 Wild strain was passaged for nine days, streaking cultures on agar plates and inoculating single colonies  
244 into liquid culture each day. On the tenth day, the culture was transformed with each of the 12 reporter  
245 plasmids and assayed with and without the cognate inducer for each reporter. Third, we determined if  
246 serial transfer would lead to the emergences of subpopulations<sup>59</sup>. We passaged the Marionette-Wild  
247 strain for nine days in liquid culture, diluting the cells  $10^6$ -fold each day ( $10^{54}$ -fold dilution total). On the  
248 tenth day, the culture was transformed with each of the 12 reporter plasmids and assayed with and  
249 without the cognate inducer for each reporter. For all three evolution experiments, the sensors perform  
250 indistinguishably after growth and passaging (Supplementary Figure 17). There is no decline in the fold-  
251 induction over time and there was no emergence of “broken” subpopulations by flow cytometry  
252 (Supplementary Figure 18).



253 This work represents a dramatic expansion in our ability to study and control genes in cells. The  
254 Marionette strains enable the modular control of up to 12 genes, simply by placing each one under the  
255 control of a small (50 to 289 base pair) inducible promoter. This means that a single construct can be built  
256 and then the expression levels perturbed in many ways through the combination of different small  
257 molecules. This could be to determine the role of proteins in a natural system, picking apart the  
258 stoichiometric requirements for a molecular machine<sup>60-61</sup>. This can also be part of rapid optimization of  
259 metabolic pathways, where the ideal stoichiometry can be identified without the need to build megabase-  
260 scale libraries<sup>62-63</sup>. Through the use of CRISPR<sup>64</sup>, sRNA<sup>65</sup>, or other tools, endogenous genes can be inducibly  
261 down-regulated as well as up-regulated, thus enabling exquisite control of natural processes and  
262 metabolic flux. Further, dynamic systems can be probed by controlling the timing of the induction of each  
263 component in order to determine the role of ordered gene expression<sup>15, 66</sup>. The ability to control gene  
264 expression has been a major limitation in genetic engineering; now, pulling the strings on Marionette  
265 enables unprecedented genetic control.

266

## 267 Acknowledgements

268

269 Supported by U.S. Office of Naval Research Multidisciplinary University Research Initiative grant #  
270 N00014-16-1-2388 (AJM, THSS, and CAV). We would like to thank Aditya M. Kunjapur and Kristala L. J.  
271 Prather for providing DNA templates for the amplification of  $P_{Van}$ ,  $P_{3B5}$ , *vanR*, and *pcaU*.

272

## 273 Accession

274 The following plasmids and strains can be acquired from Addgene: pAJM.711 ( $P_{PhIF}$ -YFP) 108512;  
275 pAJM.712 ( $P_{CymRC}$ -YFP) 108513; pAJM.713 ( $P_{LuxB}$ -YFP) 108514; pAJM.714 ( $P_{VanCC}$ -YFP) 108515; pAJM.715  
276 ( $P_{Tac}$ -YFP) 108516; pAJM.717 ( $P_{Tet*}$ -YFP) 108517; pAJM.716 ( $P_{BAD}$ -YFP) 108518; pAJM.718 ( $P_{BetI}$ -YFP)  
277 108519; pAJM.719 ( $P_{Ttg}$ -YFP) 108520; pAJM.1459 ( $P_{3B5C}$ -YFP) 108521; pAJM.721 ( $P_{SalITTC}$ -YFP) 108522;  
278 pAJM.944 ( $P_{Cin}$ -YFP) 108523; pAJM.847 ( $PhIF^{AM}$  +  $P_{PhIF}$ -YFP) 108524; pAJM.657 ( $CymR^{AM}$  +  $P_{CymRC}$ -YFP)  
279 108525; pAJM.474 ( $LuxR$  +  $P_{LuxB}$ -YFP) 108526; pAJM.773 ( $VanR^{AM}$  +  $P_{VanCC}$ -YFP) 108527; pAJM.336 ( $LacI^{AM}$   
280 +  $P_{Tac}$ -YFP) 108528; pAJM.011 ( $TetR$  +  $P_{Tet*}$ -YFP) 108529; pAJM.677 ( $AraC^{AM}$  +  $AraE$  +  $P_{BAD}$ -YFP) 108530;  
281 pAJM.683 ( $BetI^{AM}$  +  $P_{BetI}$ -YFP) 108531; pAJM.661 ( $TtgR^{AM}$  +  $P_{Ttg}$ -YFP) 108532; pAJM.690 ( $PcaU^{AM}$  +  $P_{3B5B}$ -  
282 YFP) 108533; pAJM.771 ( $NahR^{AM}$  +  $P_{SalITTC}$ -YFP) 108534; pAJM.1642 ( $CinR^{AM}$  +  $P_{Cin}$ -YFP) 108535; pAJM.884  
283 ( $AcuR^{AM}$  +  $P_{Acu}$ -YFP) 108536; pAJM.969 ( $MphR^{AM}$  +  $EryR$  +  $P_{Mph}$ -YFP) 108537; sAJM.1504 (Marionette-Clo)  
284 108251; sAJM.1505 (Marionette-Pro) 108253; sAJM.1506 (Marionette-Wild) 108254.

285

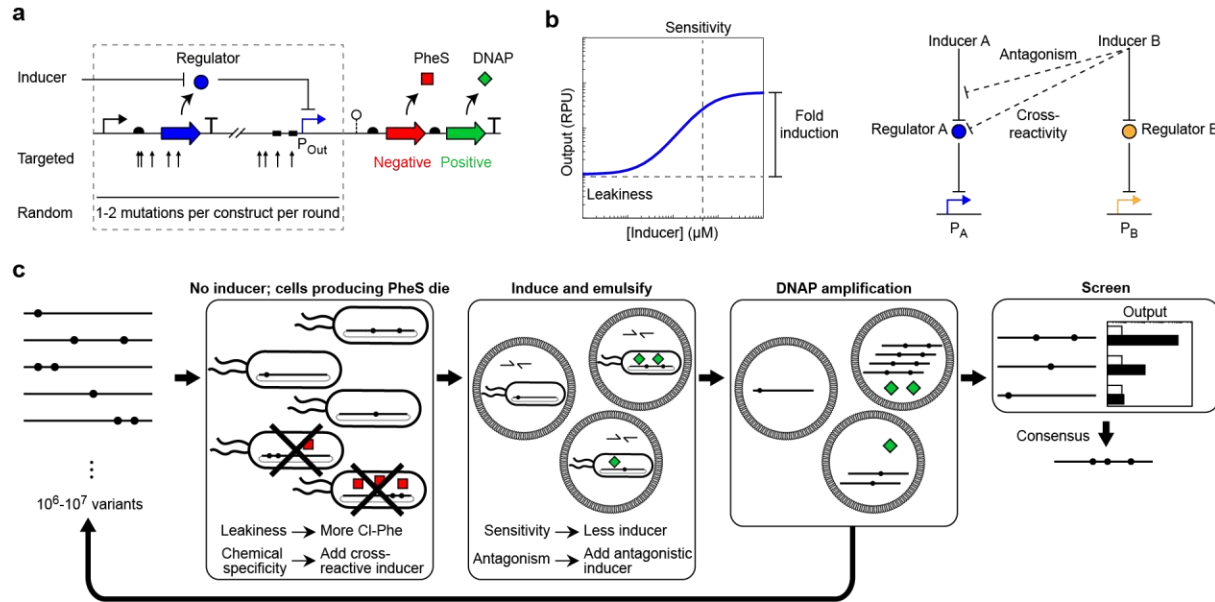

286

287

288 **Figure 1: A dual selection for sensor optimization.** **a**) A regulator (blue circle) is expressed from a weak  
 289 constitutive promoter and controls expression from the output promoter ( $P_{Out}$ ) while itself being  
 290 controlled by an externally applied inducer molecule. Transcription from  $P_{Out}$  determines the expression  
 291 level of an aminoacyl-tRNA synthetase (PheS; red square) and a DNA polymerase (KOD or PK6; green  
 292 diamond). Initial libraries may contain targeted degeneracy in the regulator RBS, regulator CDS, or  $P_{Out}$   
 293 (arrows), and random mutations are added throughout the entire library during each round of selection.  
 294 **b**) A response function captures the activity of  $P_{Out}$  at various levels of inducer. Regulator A affects  
 295 promoter A, and is itself affected by inducer A. Inducer B may affect Regulator A (chemical cross-reactivity)  
 296 or interfere with inducer A's action (antagonism). **c**) The dual selection schema is shown (see text for  
 297 details). Dots denote mutations; half arrows represent PCR primers.

298

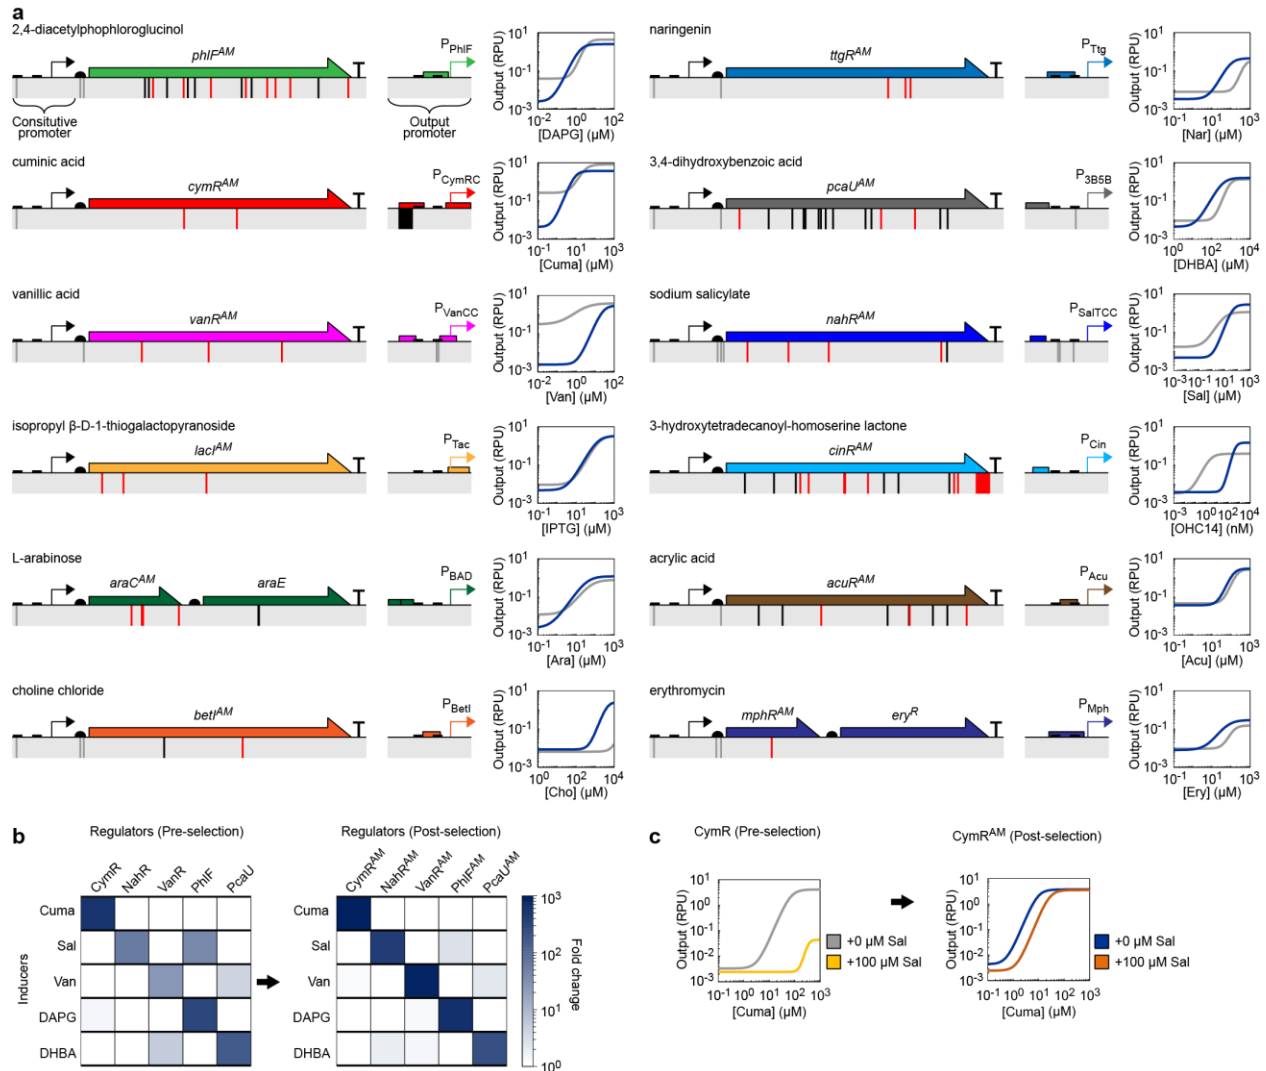

299  
300

301 **Figure 2: Improved sensor performance.** **a)** Each genetically encoded sensor is shown, with coding (red)  
 302 and non-coding (grey/black) mutations noted. Mutations in grey were also applied to the parental sensor.  
 303 The corresponding response functions comparing the evolved (blue) and parental (grey) sensors. The fit  
 304 of Equation 1 to the mean of three replicates performed on different days is shown (see Supplementary  
 305 Figure 5 for data). The response function parameters for evolved sensors are provided in Table 1. **b)**  
 306 Chemical cross-reactivity heat-map of reference (left) and evolved (right) sensors. Inducer concentrations  
 307 were: 100  $\mu\text{M}$  Cuma, 100  $\mu\text{M}$  Sal, 100  $\mu\text{M}$  Van, 10  $\mu\text{M}$  DAPG, and 1 mM DHBA. The mean of three  
 308 replicates performed on different days is shown (see Supplementary Figure 8 for data). **c)** Response  
 309 function with Sal (light/dark orange) and without Sal (grey/blue) for parental CymR (left) and evolved  
 310 CymR<sup>AM</sup> (right). The fit of Equation 1 to the mean of three replicates from different days is shown (see  
 311 Supplementary Figure 7 for data). Sequences of promoters and regulators are provided in Supplementary  
 312 Table 1 and 4.

313

314

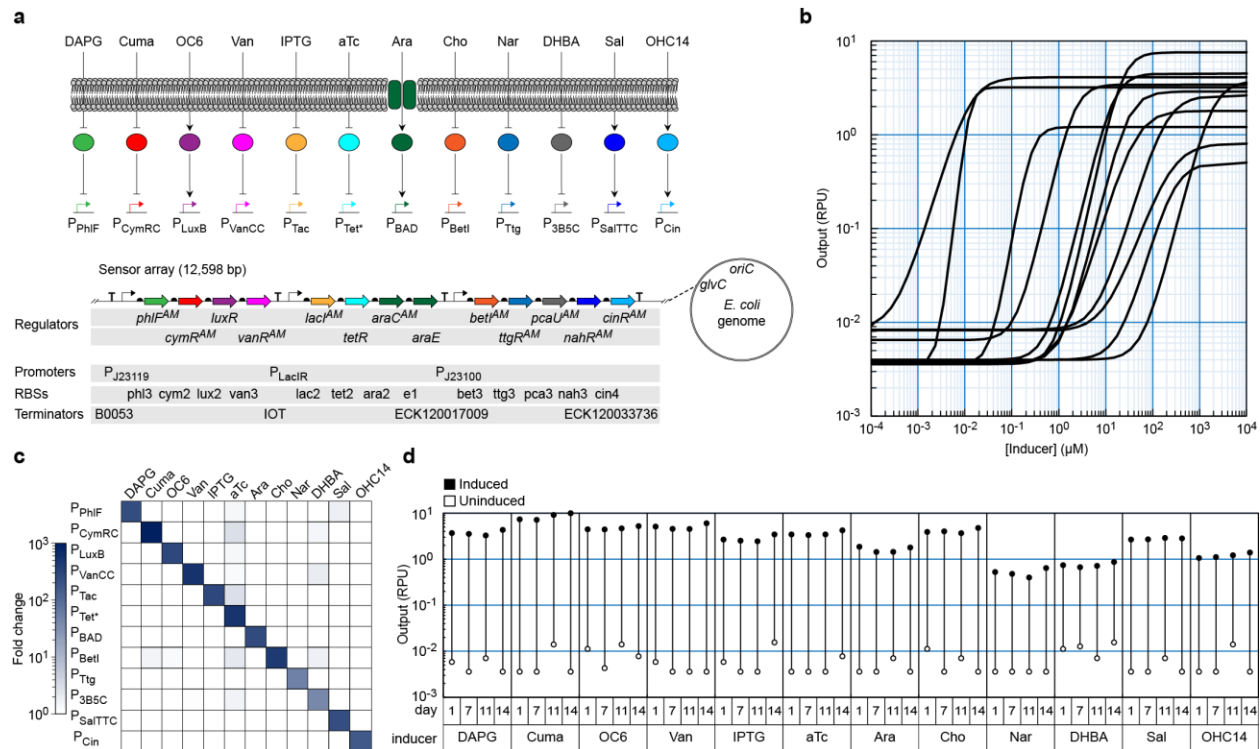

315

316

317 **Figure 3: Marionette-Wild performance.** **a)** The molecular and genetic schematic of the Marionette  
 318 cluster and its location in the *E. coli* genome. The cluster was inserted in the direction of leading strand  
 319 replication, between 3,860,010 and 3,861,627 in *E. coli* MG1655 (NCBI accession number NC\_000913),  
 320 between 3,957,594 and 3,959,211 in *E. coli* DH10B (NC\_010473), and between 3,720,027 and 3,721,644  
 321 in *E. coli* BL21 (CP010816). **b)** Overlaid response functions for each of the 12 output promoters with their  
 322 cognate inducers. The fit of Equation 1 to the mean of three replicates performed on different days is  
 323 shown (see Supplementary Figure 11 for data). The response function parameters are provided in Table  
 324 1. **c)** Chemical cross-reactivity heat-map of the 12 output promoters with each inducer. Inducer  
 325 concentrations were: 25  $\mu$ M DAPG, 500  $\mu$ M Cuma, 10  $\mu$ M OC6, 100  $\mu$ M Van, 1 mM IPTG, 200 nM aTc, 4  
 326 mM Ara, 10 mM Cho, 1 mM Nar, 2.5 mM DHBA, 250  $\mu$ M Sal, and 10  $\mu$ M OHC14. The mean of three  
 327 replicates performed on different days is shown (see Supplementary Figure 13 for data). **d)** Output of  
 328 uninduced (open circles) and induced (closed circles) cultures on day 1, 7, 11, and 14 days of passaging.  
 329 Inducer concentrations were: 25  $\mu$ M DAPG, 500  $\mu$ M Cuma, 10  $\mu$ M OC6, 100  $\mu$ M Van, 1 mM IPTG, 200 nM  
 330 aTc, 4 mM Ara, 10 mM Cho, 1 mM Nar, 2.5 mM DHBA, 250  $\mu$ M Sal, and 10  $\mu$ M OHC14. A single  
 331 evolutionary trajectory is shown. Passaging details and data from other days are provided in  
 332 Supplementary Figure 17.

333

334 **Table 1. Sensor response function parameters<sup>a</sup>**

| Inducer <sup>d</sup> | Max inducer (μM) <sup>b</sup>    | Genome-based regulator (Marionette-Wild <sup>c</sup> ) |                                  |          |       | Plasmid-based regulator ( <i>E. coli</i> DH10B) |                                  |          |       |     |
|----------------------|----------------------------------|--------------------------------------------------------|----------------------------------|----------|-------|-------------------------------------------------|----------------------------------|----------|-------|-----|
|                      |                                  | $Y_{max}$ (RPU)                                        | $Y_{min}$ (RPUx10 <sup>3</sup> ) | $K$ (μM) | $n$   | $Y_{max}$ (RPU)                                 | $Y_{min}$ (RPUx10 <sup>3</sup> ) | $K$ (μM) | $n$   |     |
| DAPG                 | 2,4-Diacetylphosphoroglucinol    | 25                                                     | 3.4                              | 6.5      | 2.1   | 2.3                                             | 2.5                              | 2.5      | 1.7   | 2.1 |
| Cuma                 | Cuminic acid                     | 100                                                    | 7.6                              | 3.6      | 22    | 2.3                                             | 3.7                              | 4.3      | 8.9   | 2.4 |
| OC6                  | 3OC6-AHL                         | 10                                                     | 4.1                              | 8.6      | 0.012 | 1.7                                             | 1.3                              | 2.4      | 0.12  | 1.8 |
| Van                  | Vanillic acid                    | 100                                                    | 4.5                              | 4.0      | 14    | 2.1                                             | 3.0                              | 2.4      | 26    | 2.3 |
| IPTG                 | Isopropyl-beta-D-thiogalactoside | 1000                                                   | 2.6                              | 8.3      | 190   | 1.7                                             | 3.3                              | 4.8      | 140   | 1.8 |
| aTc                  | Anhydrotetracycline HCl          | 0.2                                                    | 3.2                              | 3.6      | 0.012 | 4.4                                             | 2.4                              | 4.9      | 0.013 | 3.8 |
| Ara                  | L-Arabinose                      | 4000                                                   | 1.8                              | 3.6      | 43    | 1.7                                             | 1.2                              | 2.4      | 37    | 1.5 |
| Cho                  | Choline chloride                 | 10000                                                  | 3.7                              | 4.0      | 1900  | 2.0                                             | 2.6                              | 8.5      | 4100  | 2.7 |
| Nar                  | Naringenin                       | 1000                                                   | 0.5                              | 4.0      | 280   | 2.3                                             | 0.5                              | 3.4      | 95    | 1.9 |
| DHBA                 | 3,4-Dihydroxybenzoic acid        | 1000                                                   | 0.8                              | 8.0      | 240   | 1.5                                             | 1.6                              | 4.5      | 370   | 1.8 |
| Sal                  | Sodium salicylate                | 100                                                    | 2.9                              | 3.8      | 29    | 2.1                                             | 2.8                              | 4.7      | 43    | 1.8 |
| OHC14                | 3OHC14:1-AHL                     | 10                                                     | 1.2                              | 3.6      | 0.25  | 3.0                                             | 1.5                              | 3.0      | 0.43  | 2.3 |
| Acu                  | Acrylic acid                     | 1000                                                   |                                  |          |       |                                                 | 3.1                              | 37.0     | 130   | 2.5 |
| Ery                  | Erythromycin                     | 125                                                    |                                  |          |       |                                                 | 0.3                              | 8.0      | 65    | 1.5 |

- 335 a. Response data from at least days were averaged and fit to Equation 1 (Methods). Full response functions are provided in Supplementary Appendix 1.  
 336 b. Growth defects are observed above this concentration.  
 337 c. Based on *E. coli* MG1655. Data for Marionette-Clo (DH10B) and Marionette-Pro (BL21) are provided in Supplementary Appendix 1.  
 338 d. DAPG-Santa Cruz sc-206518; Cuma-Sigma 268402; OC6-Sigma K3007; Van-Sigma 94770; IPTG-Gold I2481C25; aTc-Sigma 37919; Ara-Sigma A3256; Cho-  
 339 Sigma C7017; Nar-Sigma N5893; DHBA-Sigma 37580; Sal-Sigma S3007; OHC14-Sigma 51481; Acu-Sigma 147230; Ery-Sigma E5389.

340

341

## 342 **Methods**

343 **Strains, plasmids, and media.** *Escherichia coli* DH10B (New England Biolabs, Ipswich, MA – USA) was used  
344 for all routine cloning and directed evolution. Plasmid-based regulator systems were characterized in *E.*  
345 *coli* DH10B. Marionette-Wild, -Clo, and -Pro were derived from *E. coli* MG1655<sup>67</sup>, *E. coli* DH10B, and *E.*  
346 *coli* BL21 (New England Biolabs, Ipswich, MA – USA) cells respectively. *E. coli* JTK164H was used to clone  
347 RK6 suicide vectors<sup>68</sup>. All other plasmids contain p15A origins of replication and kanamycin resistance  
348 (Supplementary Figures 2 and 6). LB-Miller media (BD, Franklin Lakes, NJ - USA) was used for directed  
349 evolution, stability assays, and cytometry assays unless specifically noted. 2xYT liquid media (BD, Franklin  
350 Lakes, NJ - USA) and LB + 1.5% agar (BD, Franklin Lakes, NJ – USA) plates were used for routine cloning  
351 and strain maintenance. M9 media (1x M9 Salts [Millipore Sigma, St. Louis, MO - USA], 2 mM MgSO<sub>4</sub>, 100  
352 μM CaCl<sub>2</sub>, and 0.2% Casamino acids) supplemented with either 0.4% glucose or 0.4% glycerol was used  
353 for cytometry assays where noted.

354  
355 **Chemical transformation.** For routine transformations, strains were made competent for chemical  
356 transformation. Overnight cultures (250 μl for *E. coli* DH10B derived cells, 100 μl for *E. coli* MG1655 and  
357 BL21 derived cells) were subcultured into 100 ml SOB media (BD, Franklin Lakes, NJ – USA) and grown at  
358 37 °C, 250 rpm for 3 hours. Cultures were centrifuged (4500g, 4 °C, 10 minutes) and pellets were  
359 resuspended in 15 ml TFBI buffer<sup>51</sup> (30 mM KOAc, 50 mM MnCl<sub>2</sub>, 100 mM RbCl, 10 mM CaCl<sub>2</sub>, and 15% v/v  
360 glycerol, pH 5.0). After 1 hour on ice, cells were centrifuged (4500g, 4 °C, 10 minutes) and pellets were  
361 resuspended in 2 ml TFBII buffer (10 mM NaMOPS pH 7.0, 75 mM CaCl<sub>2</sub>, 10 mM RbCl, and 15% v/v  
362 glycerol). Competent cells were stored at -80 °C until use.

363  
364 **Response function measurements (mid-log phase).** All measurements shown were taken by cytometry  
365 of cells in mid-log growth except when noted. Glycerol stocks of strains containing the plasmids of interest  
366 were streaked on LB + 1.5% Agar plates and grown overnight at 37 °C. Single colonies were inoculated  
367 into 1 ml LB + antibiotics in 2-ml 96-deepwell plates (USA Scientific, Orlando, FL - USA) sealed with an  
368 AeraSeal film (Excel Scientific, Victorville, CA - USA) and grown at 37 °C, 900 rpm overnight in a Multitron  
369 Pro shaker incubator (INFORS HT, Bottmingen, Switzerland). The overnight growths were diluted 1:200  
370 into 1 ml LB + antibiotics in 2-ml 96-deepwell plates + AeraSeal film and grown at 37 °C, 900 rpm. After 2  
371 hours the growths were diluted (*E. coli* DH10B/Marionette-Clo 1:500; *E. coli* BL21/Marionette-Pro 1:2,000;  
372 *E. coli* MG1655/Marionette-Wild 1:5,000) into prewarmed LB + antibiotics + inducer where necessary in

373 2-ml 96-deepwell plates + AeraSeal film and grown at 37 °C, 900 rpm for 5 hours. After growth, 20 µl of  
374 culture sample was diluted into 180 µl PBS + 200 µg/ml kanamycin to inhibit translation.

375

376 **Response function measurements (stationary phase).** Measurements were taken from cells in stationary  
377 phase to generate data shown in Supplementary Appendix 1 and Supplementary Figures 12 and 13.  
378 Glycerol stocks of strains containing the plasmids of interest were streaked on LB + 1.5% Agar plates and  
379 grown overnight at 37 °C. Single colonies were inoculated into 1 ml LB + antibiotics in 2-ml 96-deepwell  
380 plates (USA Scientific, Orlando, FL - USA) sealed with an AeraSeal film (Excel Scientific, Victorville, CA -  
381 USA) and grown at 37 °C, 900 rpm overnight in a Multitron Pro shaker incubator (INFORS HT, Bottmingen,  
382 Switzerland). The overnight growths were diluted 1:200 into 1 ml LB + antibiotics in 2-ml 96-deepwell  
383 plates + AeraSeal film and grown at 37 °C, 900 rpm. After 2 hours the growths were diluted (*E. coli*  
384 DH10B/Marionette-Clo 1:500; *E. coli* BL21/Marionette-Pro 1:2,000; *E. coli* MG1655/Marionette-Wild  
385 1:5,000) into prewarmed LB + antibiotics + inducer where necessary in 2-ml 96-deepwell plates + AeraSeal  
386 film and grown at 37 °C, 900 rpm for 20 hours. After growth, 2 µl of culture sample was diluted into 198  
387 µl PBS + 200 µg/ml kanamycin to inhibit translation.

388

389 **Time course (mid-log phase).** For Supplemental Figure 12: mid-log induction time course, glycerol stocks  
390 of strains containing the plasmids of interest were streaked on LB + 1.5% Agar plates and grown overnight  
391 at 37 °C. Single colonies were inoculated into 1 ml LB + antibiotics in 2-ml 96-deepwell plates (USA  
392 Scientific, Orlando, FL - USA) sealed with an AeraSeal film (Excel Scientific, Victorville, CA - USA) and grown  
393 at 37 °C, 900 rpm overnight in a Multitron Pro shaker incubator (INFORS HT, Bottmingen, Switzerland).  
394 The overnight growths were diluted 1:200 into 1 ml LB + antibiotics in 2-ml 96-deepwell plates + AeraSeal  
395 film and grown at 37 °C, 900 rpm. After 2 hours the growths were diluted 1:500 into prewarmed LB +  
396 antibiotics. After 0, 1, 2, 3, 3.5, 4, 4.25, 4.5, or 4.75 hours, cultures were further diluted 1:10 into  
397 prewarmed LB + antibiotics + inducer where necessary in 2-ml 96-deepwell plates + AeraSeal film and  
398 grown at 37 °C, 900 rpm for 5, 4, 3, 2, 1.5, 1, 0.75, 0.5, or 0.25 hours (5 hours total after the initial growth).  
399 After growth, 20 µl of culture sample was diluted into 180 µl PBS + 200 µg/ml kanamycin to inhibit  
400 translation.

401

402 **Time course (mid-log phase to stationary phase).** For Supplemental Figure 12: mid-log to stationary  
403 induction time course, glycerol stocks of strains containing the plasmids of interest were streaked on LB  
404 + 1.5% Agar plates and grown overnight at 37 °C. Single colonies were inoculated into 1 ml LB + antibiotics

405 in 2-ml 96-deepwell plates (USA Scientific, Orlando, FL - USA) sealed with an AeraSeal film (Excel Scientific,  
406 Victorville, CA - USA) and grown at 37 °C, 900 rpm overnight in a Multitron Pro shaker incubator (INFORS  
407 HT, Bottmingen, Switzerland). The overnight growths were diluted 1:200 into 1 ml LB + antibiotics in 2-ml  
408 96-deepwell plates + AeraSeal film and grown at 37 °C, 900 rpm. After 2 hours the growths were diluted  
409 1:5000 into prewarmed LB + antibiotics + inducer where necessary in 2-ml 96-deepwell plates + AeraSeal  
410 film and grown at 37 °C, 900 rpm for 5, 6, 7, 8, 9, 10, or 20 hours. After growth, 2 to 20 µl of culture  
411 sample was diluted into 180-198 µl PBS + 200 µg/ml kanamycin to inhibit translation.

412  
413 **Cytometry analysis.** Fluorescence characterization with cytometry was performed on a BD LSR Fortessa  
414 flow cytometer with HTS attachment (BD, Franklin Lakes, NJ - USA). Cells diluted in PBS + kanamycin were  
415 run at a rate of 0.5 µl/s. The events were gated by forward scatter height (mid-log: 1,000-10,000;  
416 stationary: 500-5000) and side scatter area (mid-log: 1,000-10,000; stationary: 500-5,000) to reduce false  
417 events. After gating, thousands of events were used for analysis. For each sample, the median YFP  
418 fluorescence was calculated. All output values are reported in terms of relative promoter units (RPU). For  
419 a given promoter measurement, the strain (*E. coli* DH10B, Marionette-Wild, etc) is transformed with the  
420 plasmid. The strain is then assayed alongside a strain containing the RPU standard plasmid  
421 (Supplementary Figure 1, Supplementary Table 8) as well as an autofluorescence control. The median  
422 autofluorescence value is subtracted from the all other median fluorescence values, including that of the  
423 RPU standard. The experimental sample value is then divided by the RPU standard value.

424  
425 **Library generation.** Portions of the initial libraries were created by PCR using degenerate oligonucleotides  
426 (Integrated DNA Technologies Coralville, IA - USA). These fragments were joined into a degenerate, full-  
427 length sensor module by overlap PCR. Sensor modules were assembled into selection vectors by Golden  
428 Gate assembly<sup>70</sup>. Linear insert and plasmid selection vector were mixed at 1:1 molar ratio totaling ~ 1 µg  
429 DNA along with 5 µl 10x T4 ligase Buffer, 1 µl T4 DNA ligase (2,000,000 U/ml), 2 µl BbsI (10,000 U/ml) (all  
430 from New England Biolabs, Ipswich, MA - USA) in 50 µl total. Reactions were cycled 45 times between 2  
431 minutes at 37 °C and 5 minutes at 16 °C, and then incubated for 30 minutes at 50 °C, 30 minutes at 37 °C,  
432 and 10 minutes at 80 °C in a DNA Engine cycler (Bio-Rad, Hercules, CA – USA). An additional 1 µl BbsI was  
433 then added, and the assembly was incubated for 1 hour at 37 °C. Assemblies were then purified using  
434 Zymo Spin I columns (Zymo Research, Irvine, CA - USA). Host cells were transformed with library plasmid  
435 by electroporation. Supplementary Appendix 2 contains a depiction of all degeneracy found in the “Initial  
436 library” for each selection.



437

438 **Negative selection.** LB media + 8 mM Cl-Phe (4-Chloro-DL-phenylalanine [Millipore Sigma, St. Louis, MO  
439 - USA]) was mixed, autoclaved, and stored at room temperature. Cl-Phe has a tendency to adhere to  
440 glassware, and care was taken to avoid disturbing the water + LB powder + Cl-Phe powder mixture prior  
441 to autoclaving. LB media + 8 mM Cl-Phe was mixed with plain LB media to achieve the desired  
442 concentration of Cl-Phe (See Interventions:[Cl-Phe] for each selection in Supplementary Appendix 2).  
443 Following transformation and outgrowth, cultures were diluted into 7 ml LB + Cl-Phe supplemented with  
444 antibiotics as well as any cross-reactive inducers (See Interventions:[Negative ligand] for each selection in  
445 Supplementary Appendix 2). Cultures were grown at 37 °C for 12-16 hours.

446

447 **Positive selection.** Following negative selection, cultures were diluted 1:100 into 2 ml LB + antibiotics in  
448 culture tubes and grown at 37 °C, 250 rpm for 2 hours. The cultures were then diluted 1:100 into 2 ml  
449 prewarmed LB + antibiotics + inducer (See Interventions:[Positive ligand] for each selection in  
450 Supplementary Appendix 2) and grown at 37 °C, 250 rpm for 4 hours. Following induction, 1 ml of culture  
451 was centrifuged at (5,000g, 25 °C, 10 minutes). Supernatant was removed and the cell pellet was  
452 resuspended in 50 µl 1x CPR buffer (50 mM Tris-HCl pH 8.8, 10 mM KCl, 2 mM MgSO<sub>4</sub>, 10 mM (NH<sub>4</sub>)<sub>2</sub>SO<sub>4</sub>).  
453 5 µl resuspension was added to 95 µl of 1 x CPR buffer plus 0.4 µM CPR primers and 200 µM dNTPs. This  
454 aqueous phase added to a 2 ml centrifuge tube containing 438 µl Tegosoft DEC (Evonik, Essen, Germany),  
455 42 µl AbilWE09 (Evonik, Essen, Germany) and 120 µl mineral oil (Millipore Sigma, St. Louis, MO - USA) and  
456 the rubber stopped from a 1 ml syringe. The mixture was vortexed at maximum setting for 2 minutes.  
457 The emulsion was split evenly five 0.2 ml PCR tubes, and thermal cycled (95 °C for 5 minutes; 20 cycles of  
458 [95 °C for 30 seconds, 55 °C for 30 seconds, 72 °C for 2 minutes/kb]; and 72 °C for 5 min). Emulsions were  
459 then centrifuged (10,000g, 25 °C, 10 minutes) and the upper (oil) phase was removed. Then, 100 µl H<sub>2</sub>O  
460 and 500 µl chloroform were added and the mixture was pipetted to disrupt the pellet. The resuspension  
461 was then transferred to a 1.5 ml heavy-gel phase-lock tube (5 Prime, San Francisco, CA - USA) and  
462 centrifuged (16,000g, 25 °C, 2 minutes). The upper (aqueous) phase was collected, and DNA was purified  
463 using Zymo Spin I columns. The library was amplified in a recovery PCR using Accuprime *Pfx* and nested  
464 recovery primers, gel purified, and assembled as described above. A depiction of the CPR primer and  
465 recovery primer amplification are provided in Supplementary Figure 6.

466

467 **Library shuffling.** Between some rounds of selection (See Interventions:Notes for each selection in  
468 Supplementary Appendix 2), libraries were shuffled upon themselves such that fragments of each mutant

469 mutually serve as both primer and template for a primer-less PCR amplification<sup>54</sup>. 1 µg linear, library DNA  
470 (from the recovery PCR) was added to a mild DNase reaction (500 mM Tris pH 7.4, 100 mM MnCl<sub>2</sub>, 0.5 U  
471 DNase [New England Biolabs, Ipswich, MA - USA]) and lightly digested for 3 minutes at 15 °C. Fragmented  
472 DNA was purified using Zymo Spin I columns and reassembled in a primer-less PCR in 1 x KAPA HiFi Master  
473 Mix (KAPA Biosystems, Wilmington, MA – USA) by thermal cycling (95 °C for 2 minutes; 35 cycles of [95 °C  
474 for 30 seconds, 65 °C for 90 seconds, 62 °C for 90 seconds, 59 °C for 90 seconds, 56 °C for 90 seconds, 53  
475 °C for 90 seconds, 50 °C for 90 seconds, 47 °C for 90 seconds, 44 °C for 90 seconds, 41 °C for 90 seconds,  
476 68 °C for 90 seconds]; and 72 °C for 4 minutes). The reassembly was purified using Zymo Spin I columns,  
477 reamplified using Accuprime *Pfx* and CPR primers, gel purified, and assembled as described above.

478  
479 **On/off screen.** At the end of each selection, libraries were assembled into the YFP screening plasmid  
480 (Supplementary Figure 6). Host cells were transformed and plated on LB-agar. Between 35 and 92  
481 individual clones were picked and assayed by cytometry as described. Cells were grown with no inducer,  
482 in the presence of cognate inducer, and when necessary in the presence of relevant non-cognate inducers.  
483 Measurements were made of cells in mid-log phase by cytometry as described. The most promising  
484 clones, as judged by dynamic range and orthogonality, were mini-prepped and the sensor region was  
485 sequenced.

486  
487 **Genomic integration.** In preparation of recombineering, cells were transformed with a plasmid  
488 containing Ara-inducible λ Red recombination machinery with a temperature sensitive origin of  
489 replication<sup>71</sup>. 50 µl of overnight culture was subcultured in 50 ml LB medium and grown at 30 °C, 250 rpm  
490 for 2 hours. 2 mM Ara was added, and the culture continued to grow at 30 °C, 250 rpm for 3 hours. The  
491 culture was then centrifuged (4500g, 4 °C, 10 minutes) and washed with ice cold 10% glycerol four times,  
492 with the fourth resuspension in 200 µl 10% glycerol. Recombineering-ready cells were stored at -80 °C  
493 until use. For the first insertion, six genes (*phlF<sup>AM</sup>*, *cymR<sup>AM</sup>*, *luxR*, *vanR<sup>AM</sup>*, *lacI<sup>AM</sup>*, and *tetR*) were Golden  
494 Gate assembled using BsaI into an RK6 suicide vector (which needs Pir protein in order to propagate)<sup>68</sup>.  
495 Pir-expressing *E. coli* JTK164H cells were transformed, and plasmids were purified, verified, and linearized  
496 with BpiI leaving homology to the *glvC* pseudogene. Recombineering-ready *E. coli* MG1655 cells were  
497 electroporated and transformed with gel-purified, linearized inserts. After an outgrowth of one hour at  
498 37 °C, transformations were plated on LB-agar plates + antibiotic (5 µg/ml chloramphenicol). Colonies  
499 were picked and grown at 37°C in LB + antibiotic, and the presence of the insert was verified by colony  
500 PCR. For the second insertion, this strain was made recombineering-ready and the process was repeated

501 with the next set of genes (*araC<sup>AM</sup>*, *araE*, *betI<sup>AM</sup>*, and *ttgR<sup>AM</sup>*) with the insert containing homology to *tetR*  
502 and *glvC* and conferring resistance to 20 µg/ml spectinomycin. For the third insertion, this strain was  
503 made recombineering-ready and the process was repeated with the final set of genes (*pcaU<sup>AM</sup>*, *nahR<sup>AM</sup>*,  
504 and *cinR<sup>AM</sup>*) with the insert containing homology to *ttgR<sup>AM</sup>* and *glvC* and conferring resistance to 5 µg/ml  
505 chloramphenicol. See Supplementary Figure 9 for schematic details.

506

507 **Phage transduction to transfer the Marionette cluster.** 50 µl of overnight culture of Marionette-Wild  
508 was subcultured in 5 ml LB medium + 0.2% glucose and 5 mM CaCl<sub>2</sub> and grown at 37 °C, 250 rpm for 30  
509 minutes. 100 µl p1 phage lysate (10<sup>9</sup> pfu/ml) was added and the culture was grown at 37 °C, 250 rpm  
510 until lysis (3 hours)<sup>72</sup>. 50 µl chloroform was added and the culture continued at 37 °C, 250 rpm for 5  
511 minutes. Culture was centrifuged (9200g, 25 °C, 10 minutes). Supernatant was filtered (0.45 µM) and  
512 stored at 4 °C until use. 1.5 ml of overnight culture of *E. coli* MG1655, BL21, or DH10B (the DH10B cells  
513 contained a temperature-sensitive plasmid transiently expressing RecA) was centrifuged (10,000g, 25 °C,  
514 5 minutes). The cell pellet was resuspended in 750 µl P1 buffer (5 mM MgSO<sub>4</sub> and 10 mM CaCl<sub>2</sub>) and up  
515 to 100 µl Marionette-P1 phage lysate was added. After 30 minutes at 25 °C, 1 ml LB + 200 µl 1 M sodium  
516 citrate was added and the culture was grown at 37 °C, 250 rpm for 30 minutes. The culture was  
517 centrifuged (10,000g, 25 °C, 2 minutes) and the pellets were resuspended in 100 µl LB and plated on LB-  
518 agar plates + 5 µg/ml chloramphenicol and 5 mM sodium citrate. Colonies were picked and grown at 37  
519 °C in LB + 5 µg/ml chloramphenicol and 5 mM sodium citrate, and the presence of the insert was verified  
520 by colony PCR. The entire Marionette cluster was verified by sequencing PCR amplicons of the cluster  
521 from the genome of Marionette-Wild.

522

523 **Sensor induction on plates.** Cells were transformed with reporter plasmids and, following outgrowth at  
524 37°C for one hour, plated on LB-agar (LB-Miller powder + 1.5 % agar [BD, Franklin Lakes, NJ – USA]) with  
525 and without the appropriate inducer. After an overnight incubation at 37°C for 16 hours, plates were  
526 incubated at 4°C for one hour and imaged using a ChemiDocMP Imaging system (Bio-Rad, Hercules, CA -  
527 USA) and Image Lab 4.0 software (Bio-Rad, Hercules, CA - USA) employing blue epi illumination, a 530/28  
528 filter and a 0.1 second exposure. Raw images were rotated and cropped using XnView (XnSoft, Reims,  
529 France). Individual colonies were scraped from the plate, resuspended in 200 µl PBS + 200 µg/ml  
530 kanamycin, and assayed by cytometry as described in Cytometry analysis.

531

532 **Plate reader assays to measure growth rates.** Glycerol stocks of strains of interest were streaked on LB +  
533 1.5% Agar plates and grown overnight at 37 °C. Single colonies were inoculated into 1 ml LB in 2-ml 96-  
534 deepwell plates (USA Scientific, Orlando, FL - USA) sealed with an AeraSeal film (Excel Scientific, Victorville,  
535 CA - USA) and grown at 37 °C, 900 rpm overnight in a Multitron Pro shaker incubator (INFORS HT,  
536 Bottmingen, Switzerland). The overnight growths were diluted 1:200 into 1 ml LB in 2-ml 96-deepwell  
537 plates + AeraSeal film and grown at 37 °C, 900 rpm. After 2 hours the growths were diluted (*E. coli*  
538 DH10B/Marionette-Clo 1:500; *E. coli* BL21/Marionette-Pro 1:2,000; *E. coli* MG1655/Marionette-Wild  
539 1:5,000) into prewarmed LB + inducer where necessary in 2-ml 96-deepwell plates. 100 µl of this culture  
540 was immediately transferred to a 300-µl 96-well black walled optical bottom plates (Thermo Scientific  
541 Nunc, Waltham, MA – USA) sealed with a BreathEasy film (Sigma-Aldrich, St. Louis, MO – USA), and grown  
542 in a Synergy H1 plate reader (BioTek, Winooski, VT – USA) at 37 °C, 1000 rpm. OD<sub>600</sub> was measured every  
543 20 minutes over 12 hours of growth. OD<sub>600</sub> readings were also taken from wells containing media with no  
544 cells, and for each time point, readings from such wells were subtracted from the appropriate sample  
545 measurements to remove background. OD<sub>600</sub> values were converted to equivalent 1 cm path length  
546 measurements using a standard curve.

547  
548 **Calculation of growth rates.** The doubling time for each 1 hour sliding window was calculated assuming  
549 exponential growth during that period. Doubling time is calculated as elapsed time (60 minutes) divided  
550 by the number of doublings that occurred in that time ( $\log_2[\text{final OD}_{600}/\text{initial OD}_{600}]$ ). The fastest doubling  
551 time (excepting the first three hours) was reported as the doubling time.

552  
553 **Evolutionary stability (passaging with reporters).** Marionette-Wild was transformed with each of the 12  
554 reporter plasmids and plated on LB-agar. Single colonies were inoculated into 1 ml LB + antibiotics in 2-  
555 ml 96-deepwell plates (USA Scientific, Orlando, FL - USA) sealed with an AeraSeal film (Excel Scientific,  
556 Victorville, CA - USA) and grown at 37 °C, 900 rpm overnight in a Multitron Pro shaker incubator (INFORS  
557 HT, Bottmingen, Switzerland). The overnight growths were diluted 1:200 into 1 ml LB + antibiotics in 2-ml  
558 96-deepwell plates + AeraSeal film and grown at 37 °C, 900 rpm. After 2 hours, the growths were diluted  
559 1:5000 into prewarmed LB + antibiotics + inducer where necessary in 2-ml 96-deepwell plates + AeraSeal  
560 film and grown at 37 °C, 900 rpm for 5 hours. After growth, 20 µl of culture sample was diluted into 180  
561 µl PBS + 200 µg/ml kanamycin to inhibit translation and assayed by cytometry as described in Cytometry  
562 analysis. Uninduced cultures were allowed to grow at 37 °C overnight (17 hours) and the process  
563 (beginning with the 1:200 dilution of the overnight culture) was repeated each day for 14 days.

564

565 **Evolutionary stability (passaging on plates).** A single colony of Marionette-Wild was inoculated into 1 ml  
566 LB in 2-ml 96-deepwell plates (USA Scientific, Orlando, FL - USA) sealed with an AeraSeal film (Excel  
567 Scientific, Victorville, CA - USA) and grown at 37 °C, 900 rpm for 12 hours in a Multitron Pro shaker  
568 incubator (INFORS HT, Bottmingen, Switzerland). The overnight growth was streaked onto LB-agar plates  
569 and grown at 37 °C for 12 hours. This process was repeated 9 times. The final culture was made  
570 chemically competent as described in Chemical transformation, transformed with relevant reporter  
571 plasmids, and assayed with cytometry as described in Cytometry analysis.

572

573 **Evolutionary stability (passaging in liquid culture).** A single colony of Marionette-Wild was inoculated  
574 into 1 ml LB in 2-ml 96-deepwell plates (USA Scientific, Orlando, FL - USA) sealed with an AeraSeal film  
575 (Excel Scientific, Victorville, CA - USA) and grown at 37 °C, 900 rpm for 12 hours in a Multitron Pro shaker  
576 incubator (INFORS HT, Bottmingen, Switzerland). The overnight growths were diluted 1:200 into 1 ml LB  
577 in 2-ml 96-deepwell plates + AeraSeal film and grown at 37 °C, 900 rpm. After 2 hours, the growths were  
578 diluted 1:5000 into prewarmed LB in 2-ml 96-deepwell plates + AeraSeal film and grown at 37 °C, 900 rpm  
579 for 22 hours. This process was repeated 9 times. The final culture was made chemically competent as  
580 described in Chemical transformation, transformed with relevant reporter plasmids, and assayed with  
581 cytometry as described in Cytometry analysis.

582

583 **Computational methods (fitting to the response function).** To parameterize the response function, error  
584 minimization was performed using the Solver function in Excel software (Microsoft, Redmond, WA - USA).  
585 Equation 1 was entered with  $y_{min}$ ,  $y_{max}$ ,  $K$ , and  $n$  as tunable parameters,  $x$  (inducer concentration) as the  
586 independent variable and  $y$  as the output. For each  $x$ , the error between the measured RPU value and  
587 the output of the function was determined. The total error was determined by summing the normalized  
588 square of the error ( $[y - \text{measured RPU value}]^2 / y$ ) for each  $x$ . The Solver function minimized the total error  
589 by tuning  $y_{min}$ ,  $y_{max}$ ,  $K$ , and  $n$ .

590

591 **Computational methods (partial randomization of amino acids).** Initial libraries for the selection of LacI  
592 and AraC utilized partial randomization of amino acids. Previous literature informed decisions regarding  
593 the desirability of including each possible residue in the library. The CASTER 2.0 tool<sup>73</sup> was used to design  
594 degenerate oligodeoxynucleotides that can sample the desired amino acids while limiting undesired  
595 amino acids and stop codons.

596

597 **Computational methods (RBS design).** The initial RBS for each regulator in the Marionette cluster was  
598 designed using the RBS Calculator v1.1<sup>55</sup> using the *E. coli* DH10B 16S rRNA setting. The “Pre-Sequence”  
599 included the last 100 bp of the upstream CDS (where appropriate) as well as any scars used in Golden  
600 Gate assembly. The “Target Translation Initiation Rates” were chosen based on the RBS strength of the  
601 plasmid-based sensor (found using the “Reverse Engineer RBSs” tool) and compensating for the reduction  
602 in copy number and increase in promoter strength associated with the move to the genomic system. After  
603 initial assembly and testing, a decision was made based on the appearance of the response function as to  
604 whether the RBS was too low, too high, or good. Low RBSs were rationally mutated to more closely  
605 resemble the consensus Shine-Dalgarno sequence (TAAGGAGGT) while high RBSs were rationally mutated  
606 to less closely resemble the consensus Shine-Dalgarno sequence. All rationally designed RBS variants  
607 were checked using the “Reverse Engineer RBSs” to guard against making dramatic, unanticipated  
608 changes to the RBS strength. Rational mutations are noted in Supplementary Table 2. Translation  
609 Initiation Rate (in arbitrary units) for each RBS variant is provided in Supplementary Figure 10.

## 610 References

- 611 1. Zuo, J.; Chua, N. H., Chemical-inducible systems for regulated expression of plant genes. *Curr*  
612 *Opin Biotechnol* **2000**, *11* (2), 146-51.
- 613 2. Keyes, W. M.; Mills, A. A., Inducible systems see the light. *Trends Biotechnol* **2003**, *21* (2), 53-5.
- 614 3. Mijakovic, I.; Petranovic, D.; Jensen, P. R., Tunable promoters in systems biology. *Curr Opin*  
615 *Biotechnol* **2005**, *16* (3), 329-35.
- 616 4. de Boer, H. A.; Comstock, L. J.; Vasser, M., The tac promoter: a functional hybrid derived from  
617 the trp and lac promoters. *Proc Natl Acad Sci U S A* **1983**, *80* (1), 21-5.
- 618 5. Lutz, R.; Bujard, H., Independent and tight regulation of transcriptional units in Escherichia coli  
619 via the LacR/O, the TetR/O and AraC/I1-I2 regulatory elements. *Nucleic Acids Res* **1997**, *25* (6), 1203-10.
- 620 6. Urban, J. H.; Vogel, J., Translational control and target recognition by Escherichia coli small RNAs  
621 in vivo. *Nucleic Acids Res* **2007**, *35* (3), 1018-37.
- 622 7. Cookson, N. A.; Mather, W. H.; Danino, T.; Mondragon-Palomino, O.; Williams, R. J.; Tsimring, L.  
623 S.; Hasty, J., Queueing up for enzymatic processing: correlated signaling through coupled degradation.  
624 *Mol Syst Biol* **2011**, *7*, 561.
- 625 8. Elowitz, M. B.; Leibler, S., A synthetic oscillatory network of transcriptional regulators. *Nature*  
626 **2000**, *403* (6767), 335-8.
- 627 9. Gardner, T. S.; Cantor, C. R.; Collins, J. J., Construction of a genetic toggle switch in Escherichia  
628 coli. *Nature* **2000**, *403* (6767), 339-42.
- 629 10. Becskei, A.; Serrano, L., Engineering stability in gene networks by autoregulation. *Nature* **2000**,  
630 *405* (6786), 590-3.
- 631 11. Elowitz, M. B.; Levine, A. J.; Siggia, E. D.; Swain, P. S., Stochastic gene expression in a single cell.  
632 *Science* **2002**, *297* (5584), 1183-6.
- 633 12. Ozbudak, E. M.; Thattai, M.; Kurtser, I.; Grossman, A. D.; van Oudenaarden, A., Regulation of  
634 noise in the expression of a single gene. *Nat Genet* **2002**, *31* (1), 69-73.
- 635 13. Isaacs, F. J.; Dwyer, D. J.; Ding, C.; Pervouchine, D. D.; Cantor, C. R.; Collins, J. J., Engineered  
636 riboregulators enable post-transcriptional control of gene expression. *Nat Biotechnol* **2004**, *22* (7), 841-  
637 7.
- 638 14. Golding, I.; Cox, E. C., RNA dynamics in live Escherichia coli cells. *Proc Natl Acad Sci U S A* **2004**,  
639 *101* (31), 11310-5.
- 640 15. Kalir, S.; Alon, U., Using a quantitative blueprint to reprogram the dynamics of the flagella gene  
641 network. *Cell* **2004**, *117* (6), 713-20.
- 642 16. Golding, I.; Paulsson, J.; Zawilski, S. M.; Cox, E. C., Real-time kinetics of gene activity in individual  
643 bacteria. *Cell* **2005**, *123* (6), 1025-36.
- 644 17. Balagadde, F. K.; Song, H.; Ozaki, J.; Collins, C. H.; Barnett, M.; Arnold, F. H.; Quake, S. R.; You, L.,  
645 A synthetic Escherichia coli predator-prey ecosystem. *Mol Syst Biol* **2008**, *4*, 187.
- 646 18. Friedland, A. E.; Lu, T. K.; Wang, X.; Shi, D.; Church, G.; Collins, J. J., Synthetic gene networks that  
647 count. *Science* **2009**, *324* (5931), 1199-202.
- 648 19. Juminaga, D.; Baidoo, E. E.; Redding-Johanson, A. M.; Batth, T. S.; Burd, H.; Mukhopadhyay, A.;  
649 Petzold, C. J.; Keasling, J. D., Modular engineering of L-tyrosine production in Escherichia coli. *Appl*  
650 *Environ Microbiol* **2012**, *78* (1), 89-98.
- 651 20. Daugherty, P. S.; Olsen, M. J.; Iverson, B. L.; Georgiou, G., Development of an optimized  
652 expression system for the screening of antibody libraries displayed on the Escherichia coli surface.  
653 *Protein Eng* **1999**, *12* (7), 613-21.
- 654 21. Caliendo, B. J.; Voigt, C. A., Targeted DNA degradation using a CRISPR device stably carried in the  
655 host genome. *Nat Commun* **2015**, *6*, 6989.

- 656 22. Schnider-Keel, U.; Seematter, A.; Maurhofer, M.; Blumer, C.; Duffy, B.; Gigot-Bonnefoy, C.;  
657 Reimann, C.; Notz, R.; Defago, G.; Haas, D.; Keel, C., Autoinduction of 2,4-diacetylphloroglucinol  
658 biosynthesis in the biocontrol agent *Pseudomonas fluorescens* CHA0 and repression by the bacterial  
659 metabolites salicylate and pyoluteorin. *J Bacteriol* **2000**, *182* (5), 1215-25.
- 660 23. Lee, S. K.; Chou, H. H.; Pflieger, B. F.; Newman, J. D.; Yoshikuni, Y.; Keasling, J. D., Directed  
661 evolution of AraC for improved compatibility of arabinose- and lactose-inducible promoters. *Appl*  
662 *Environ Microbiol* **2007**, *73* (18), 5711-5.
- 663 24. Grant, P. K.; Dalchau, N.; Brown, J. R.; Federici, F.; Rudge, T. J.; Yordanov, B.; Patange, O.;  
664 Phillips, A.; Haseloff, J., Orthogonal intercellular signaling for programmed spatial behavior. *Mol Syst Biol*  
665 **2016**, *12* (1), 849.
- 666 25. Scott, S. R.; Hasty, J., Quorum Sensing Communication Modules for Microbial Consortia. *ACS*  
667 *Synth Biol* **2016**, *5* (9), 969-77.
- 668 26. Tashiro, Y.; Kimura, Y.; Furubayashi, M.; Tanaka, A.; Terakubo, K.; Saito, K.; Kawai-Noma, S.;  
669 Umeno, D., Directed evolution of the autoinducer selectivity of *Vibrio fischeri* LuxR. *J Gen Appl Microbiol*  
670 **2016**, *62* (5), 240-247.
- 671 27. Halleran, A.; Murray, R. M., Cell-free and in vivo characterization of Lux, Las, and Rpa quorum  
672 activation systems in *E. coli*. *ACS Synth Biol* **2017**.
- 673 28. Gyorgy, A.; Jimenez, J. I.; Yazbek, J.; Huang, H. H.; Chung, H.; Weiss, R.; Del Vecchio, D., Isocost  
674 Lines Describe the Cellular Economy of Genetic Circuits. *Biophys J* **2015**, *109* (3), 639-46.
- 675 29. Callura, J. M.; Cantor, C. R.; Collins, J. J., Genetic switchboard for synthetic biology applications.  
676 *Proc Natl Acad Sci U S A* **2012**, *109* (15), 5850-5.
- 677 30. Carrier, T. A.; Keasling, J. D., Investigating autocatalytic gene expression systems through  
678 mechanistic modeling. *J Theor Biol* **1999**, *201* (1), 25-36.
- 679 31. Bintu, L.; Buchler, N. E.; Garcia, H. G.; Gerland, U.; Hwa, T.; Kondev, J.; Phillips, R., Transcriptional  
680 regulation by the numbers: models. *Curr Opin Genet Dev* **2005**, *15* (2), 116-24.
- 681 32. Salis, H.; Tamsir, A.; Voigt, C., Engineering bacterial signals and sensors. *Contrib Microbiol* **2009**,  
682 *16*, 194-225.
- 683 33. Daber, R.; Sochor, M. A.; Lewis, M., Thermodynamic analysis of mutant lac repressors. *J Mol Biol*  
684 **2011**, *409* (1), 76-87.
- 685 34. Gatti-Lafranconi, P.; Dijkman, W. P.; Devenish, S. R.; Hollfelder, F., A single mutation in the core  
686 domain of the lac repressor reduces leakiness. *Microb Cell Fact* **2013**, *12*, 67.
- 687 35. Ike, K.; Arasawa, Y.; Koizumi, S.; Mihashi, S.; Kawai-Noma, S.; Saito, K.; Umeno, D., Evolutionary  
688 Design of Choline-Inducible and -Repressible T7-Based Induction Systems. *ACS Synth Biol* **2015**, *4* (12),  
689 1352-60.
- 690 36. Mannan, A. A.; Liu, D.; Zhang, F.; Oyarzun, D. A., Fundamental Design Principles for  
691 Transcription-Factor-Based Metabolite Biosensors. *ACS Synth Biol* **2017**, *6* (10), 1851-1859.
- 692 37. Yokobayashi, Y.; Weiss, R.; Arnold, F. H., Directed evolution of a genetic circuit. *Proc Natl Acad*  
693 *Sci U S A* **2002**, *99* (26), 16587-91.
- 694 38. Tang, S. Y.; Fazelinia, H.; Cirino, P. C., AraC regulatory protein mutants with altered effector  
695 specificity. *J Am Chem Soc* **2008**, *130* (15), 5267-71.
- 696 39. Tang, S. Y.; Cirino, P. C., Design and application of a mevalonate-responsive regulatory protein.  
697 *Angew Chem Int Ed Engl* **2011**, *50* (5), 1084-6.
- 698 40. Tashiro, Y.; Fukutomi, H.; Terakubo, K.; Saito, K.; Umeno, D., A nucleoside kinase as a dual  
699 selector for genetic switches and circuits. *Nucleic Acids Res* **2011**, *39* (3), e12.
- 700 41. Tang, S. Y.; Qian, S.; Akinterinwa, O.; Frei, C. S.; Gredell, J. A.; Cirino, P. C., Screening for  
701 enhanced triacetic acid lactone production by recombinant *Escherichia coli* expressing a designed  
702 triacetic acid lactone reporter. *J Am Chem Soc* **2013**, *135* (27), 10099-103.



- 703 42. Taylor, N. D.; Garruss, A. S.; Moretti, R.; Chan, S.; Arbing, M. A.; Cascio, D.; Rogers, J. K.; Isaacs, F.  
704 J.; Kosuri, S.; Baker, D.; Fields, S.; Church, G. M.; Raman, S., Engineering an allosteric transcription factor  
705 to respond to new ligands. *Nat Methods* **2016**, *13* (2), 177-83.
- 706 43. Maranhao, A. C.; Ellington, A. D., Evolving Orthogonal Suppressor tRNAs To Incorporate  
707 Modified Amino Acids. *ACS Synth Biol* **2017**, *6* (1), 108-119.
- 708 44. Xiu, Y.; Jang, S.; Jones, J. A.; Zill, N. A.; Linhardt, R. J.; Yuan, Q.; Jung, G. Y.; Koffas, M. A. G.,  
709 Naringenin-responsive riboswitch-based fluorescent biosensor module for Escherichia coli co-cultures.  
710 *Biotechnol Bioeng* **2017**, *114* (10), 2235-2244.
- 711 45. Daber, R.; Lewis, M., Towards evolving a better repressor. *Protein Eng Des Sel* **2009**, *22* (11),  
712 673-83.
- 713 46. Kast, P., pKSS--a second-generation general purpose cloning vector for efficient positive  
714 selection of recombinant clones. *Gene* **1994**, *138* (1-2), 109-14.
- 715 47. Thyer, R.; Filipovska, A.; Rackham, O., Engineered rRNA enhances the efficiency of  
716 selenocysteine incorporation during translation. *J Am Chem Soc* **2013**, *135* (1), 2-5.
- 717 48. Takagi, M.; Nishioka, M.; Kakahara, H.; Kitabayashi, M.; Inoue, H.; Kawakami, B.; Oka, M.;  
718 Imanaka, T., Characterization of DNA polymerase from Pyrococcus sp. strain KOD1 and its application to  
719 PCR. *Appl Environ Microbiol* **1997**, *63* (11), 4504-10.
- 720 49. Gollihar, J. D., Jr. Methods in protein engineering and screening: from rational design to directed  
721 evolution and beyond Ph.D. Dissertation, University of Texas, at Austin, 2015.
- 722 50. Ellefson, J. W.; Meyer, A. J.; Hughes, R. A.; Cannon, J. R.; Brodbelt, J. S.; Ellington, A. D., Directed  
723 evolution of genetic parts and circuits by compartmentalized partnered replication. *Nature*  
724 *Biotechnology* **2014**, *32* (1), 97-101.
- 725 51. Abil, Z.; Ellefson, J. W.; Gollihar, J. D.; Watkins, E.; Ellington, A. D., Compartmentalized partnered  
726 replication for the directed evolution of genetic parts and circuits. *Nat Protoc* **2017**, *12* (12), 2493-2512.
- 727 52. Khlebnikov, A.; Datsenko, K. A.; Skaug, T.; Wanner, B. L.; Keasling, J. D., Homogeneous  
728 expression of the P(BAD) promoter in Escherichia coli by constitutive expression of the low-affinity high-  
729 capacity AraE transporter. *Microbiology* **2001**, *147* (Pt 12), 3241-7.
- 730 53. Rogers, J. K.; Guzman, C. D.; Taylor, N. D.; Raman, S.; Anderson, K.; Church, G. M., Synthetic  
731 biosensors for precise gene control and real-time monitoring of metabolites. *Nucleic Acids Res* **2015**, *43*  
732 (15), 7648-60.
- 733 54. Meyer, A. J.; Ellefson, J. W.; Ellington, A. D., Library generation by gene shuffling. *Current*  
734 *protocols in molecular biology* **2014**, 15.12. 1-15.12. 7.
- 735 55. Salis, H. M.; Mirsky, E. A.; Voigt, C. A., Automated design of synthetic ribosome binding sites to  
736 control protein expression. *Nat Biotechnol* **2009**, *27* (10), 946-50.
- 737 56. Lee, J. W.; Gyorgy, A.; Cameron, D. E.; Pyenson, N.; Choi, K. R.; Way, J. C.; Silver, P. A.; Del  
738 Vecchio, D.; Collins, J. J., Creating Single-Copy Genetic Circuits. *Mol Cell* **2016**, *63* (2), 329-336.
- 739 57. Bassalo, M. C.; Garst, A. D.; Halweg-Edwards, A. L.; Grau, W. C.; Domaille, D. W.; Mutalik, V. K.;  
740 Arkin, A. P.; Gill, R. T., Rapid and Efficient One-Step Metabolic Pathway Integration in E. coli. *ACS Synth*  
741 *Biol* **2016**, *5* (7), 561-8.
- 742 58. West, S. C., Enzymes and molecular mechanisms of genetic recombination. *Annu Rev Biochem*  
743 **1992**, *61*, 603-40.
- 744 59. Barrick, J. E.; Lenski, R. E., Genome dynamics during experimental evolution. *Nat Rev Genet*  
745 **2013**, *14* (12), 827-39.
- 746 60. Alon, U.; Surette, M. G.; Barkai, N.; Leibler, S., Robustness in bacterial chemotaxis. *Nature* **1999**,  
747 *397* (6715), 168-71.
- 748 61. Zhang, Y.; Lara-Tejero, M.; Bewersdorf, J.; Galan, J. E., Visualization and characterization of  
749 individual type III protein secretion machines in live bacteria. *Proc Natl Acad Sci U S A* **2017**, *114* (23),  
750 6098-6103.

- 751 62. Zelcbuch, L.; Antonovsky, N.; Bar-Even, A.; Levin-Karp, A.; Barenholz, U.; Dayagi, M.;  
752 Liebermeister, W.; Flamholz, A.; Noor, E.; Amram, S.; Brandis, A.; Bareia, T.; Yofe, I.; Jubran, H.; Milo, R.,  
753 Spanning high-dimensional expression space using ribosome-binding site combinatorics. *Nucleic Acids*  
754 *Res* **2013**, *41* (9), e98.
- 755 63. Smanski, M. J.; Bhatia, S.; Zhao, D.; Park, Y.; L, B. A. W.; Giannoukos, G.; Ciulla, D.; Busby, M.;  
756 Calderon, J.; Nicol, R.; Gordon, D. B.; Densmore, D.; Voigt, C. A., Functional optimization of gene clusters  
757 by combinatorial design and assembly. *Nat Biotechnol* **2014**, *32* (12), 1241-9.
- 758 64. Larson, M. H.; Gilbert, L. A.; Wang, X.; Lim, W. A.; Weissman, J. S.; Qi, L. S., CRISPR interference  
759 (CRISPRi) for sequence-specific control of gene expression. *Nat Protoc* **2013**, *8* (11), 2180-96.
- 760 65. Ghodasara, A.; Voigt, C. A., Balancing gene expression without library construction via a reusable  
761 sRNA pool. *Nucleic Acids Res* **2017**, *45* (13), 8116-8127.
- 762 66. Gupta, A.; Reizman, I. M.; Reisch, C. R.; Prather, K. L., Dynamic regulation of metabolic flux in  
763 engineered bacteria using a pathway-independent quorum-sensing circuit. *Nat Biotechnol* **2017**, *35* (3),  
764 273-279.
- 765 67. Blattner, F. R.; Plunkett, G., 3rd; Bloch, C. A.; Perna, N. T.; Burland, V.; Riley, M.; Collado-Vides, J.;  
766 Glasner, J. D.; Rode, C. K.; Mayhew, G. F.; Gregor, J.; Davis, N. W.; Kirkpatrick, H. A.; Goeden, M. A.; Rose,  
767 D. J.; Mau, B.; Shao, Y., The complete genome sequence of Escherichia coli K-12. *Science* **1997**, *277*  
768 (5331), 1453-62.
- 769 68. Kittleson, J. T.; Cheung, S.; Anderson, J. C., Rapid optimization of gene dosage in E. coli using  
770 DIAL strains. *J Biol Eng* **2011**, *5*, 10.
- 771 69. Nielsen, A. A.; Der, B. S.; Shin, J.; Vaidyanathan, P.; Paralanov, V.; Strychalski, E. A.; Ross, D.;  
772 Densmore, D.; Voigt, C. A., Genetic circuit design automation. *Science* **2016**, *352* (6281), aac7341.
- 773 70. Weber, E.; Engler, C.; Gruetzner, R.; Werner, S.; Marillonnet, S., A modular cloning system for  
774 standardized assembly of multigene constructs. *PLoS One* **2011**, *6* (2), e16765.
- 775 71. Datsenko, K. A.; Wanner, B. L., One-step inactivation of chromosomal genes in Escherichia coli K-  
776 12 using PCR products. *Proc Natl Acad Sci U S A* **2000**, *97* (12), 6640-5.
- 777 72. Thomason, L. C.; Costantino, N.; Court, D. L., E. coli genome manipulation by P1 transduction.  
778 *Curr Protoc Mol Biol* **2007**, *Chapter 1*, Unit 1 17.
- 779 73. Reetz, M. T.; Carballeira, J. D., Iterative saturation mutagenesis (ISM) for rapid directed  
780 evolution of functional enzymes. *Nat Protoc* **2007**, *2* (4), 891-903.

781

782

783

784

785

786

787

788

789
